# Supplementary material for: Underutilization of Mental Health Services Among Bereaved Caregivers With Prolonged Grief Disorder
Source: Atypon-hosted journal article supplement (doi:10.1176/ps.62.10.pss6210_1225), 2011-10-01
Supplement: Lichtenthal_ds.pdf [file Lichtenthal_ds.pdf]

**Appendix A.** Supplementary recruitment details.

Patient-caregiver dyads were recruited with between November 15, 2002 and September 7, 2006 from the Yale Cancer Center (CT), the Veterans Affairs Connecticut Healthcare System Comprehensive Cancer Clinics (CT), Memorial Sloan-Kettering Cancer Center (NY), Dana-Farber Cancer Institute (MA), New Hampshire Oncology-Hematology(NH), Simmons Comprehensive Cancer Center (TX), and the Parkland Hospital Palliative Care Service (TX). Patient-caregiver dyads were excluded when they were cognitively impaired or could not speak English or Spanish.

Of the 927 eligible patients approached, 287 (31%) declined participation. The most common reasons for patients not participating included “not interested” ( $n=120$ ), “caregiver refuses” ( $n=37$ ), and “too upset” ( $n=28$ ). Nonparticipating patients were more likely to be white ( $p=.04$ ) and to report greater distress ( $p<.001$ ).

## Appendix B. Sample Characteristics of Bereaved Caregivers of Advanced Cancer Patients

| Characteristic                              | Total Sample (N = 86) |        |                      |
|---------------------------------------------|-----------------------|--------|----------------------|
|                                             | N                     | %      |                      |
| Gender ( <i>n</i> =86)                      |                       |        |                      |
| Male                                        | 14                    | 16     |                      |
| Female                                      | 72                    | 84     |                      |
| Race ( <i>n</i> =85)                        |                       |        |                      |
| White                                       | 47                    | 55     |                      |
| Black                                       | 17                    | 20     |                      |
| Hispanic                                    | 17                    | 20     |                      |
| Asian                                       | 2                     | 2      |                      |
| Other                                       | 2                     | 2      |                      |
| Relationship to patient ( <i>n</i> =83)     |                       |        |                      |
| Spouse/partner                              | 38                    | 46     |                      |
| Child                                       | 21                    | 25     |                      |
| Other                                       | 24                    | 29     |                      |
| Marital Status at baseline ( <i>n</i> =81)  |                       |        |                      |
| Married                                     | 49                    | 61     |                      |
| Unmarried                                   | 32                    | 39     |                      |
|                                             |                       | Median | Range                |
| Age(M±SD years)                             | 48.4±12.5             | 48.5   | 24-79                |
| Education(M±SD years)                       | 12.5±3.5              | 12     | 2-19                 |
| Time Since Patient's Death, months          | 6.8±.8                | 6.6    | 6.0-9.4 <sup>a</sup> |
| Time from Baseline to Patient's Death, days | 4.8±4.3               | 3.1    | .3-23.8              |

<sup>a</sup> Only caregivers with prolonged grief disorder data and who were greater than 6 months post-loss were included in the analyses (*n*=86). Bereaved caregivers without Prolonged Grief Disorder data (*n*=99) were older ( $p=.001$ ) and more educated ( $p=.002$ ), less likely to be depressed ( $p=.015$ ), and more likely to have health insurance ( $p<.001$ ) and to be White ( $p=.002$ ) than caregivers for whom prolonged grief disorder data was available. They were more likely to be recruited from New Hampshire Oncology-Hematology ( $p<.001$ ) or Simmons Comprehensive Cancer Center ( $p=.017$ ) and less likely from the Veterans Affairs Connecticut Healthcare Comprehensive Cancer Clinics ( $p=.014$ ) and Parkland Hospital Palliative Care Service ( $p<.001$ ). They were also less likely to report post-loss discussions about mental health concerns with a professional ( $p=.017$ ) and access to bereavement mental health service use (trend toward significance;  $p=.056$ ).



**Appendix C.**Differences in Health-Related Quality of Life between Bereaved Caregivers with and without Mental Disorders

| SF-36 Measure                     | Prolonged Grief Disorder |              |                        |              |                  |
|-----------------------------------|--------------------------|--------------|------------------------|--------------|------------------|
|                                   | Yes (N=14) <sup>c</sup>  |              | No (N=72) <sup>c</sup> |              | p <sup>a,b</sup> |
|                                   | Mean <sup>d</sup>        | SD           | Mean <sup>d</sup>      | SD           |                  |
| Physical Functioning              | 83.57                    | 23.32        | 87.22                  | 20.64        | .555             |
| Role Limitations-Physical         | 78.57                    | 39.05        | 79.51                  | 36.42        | .930             |
| Bodily Pain                       | 66.93                    | 29.23        | 77.08                  | 24.52        | .173             |
| General Health                    | 59.86                    | 25.00        | 69.39                  | 22.25        | .154             |
| <b>Vitality/Energy Level</b>      | <b>39.23</b>             | <b>23.70</b> | <b>53.82</b>           | <b>23.99</b> | <b>.046</b>      |
| <b>Social Functioning</b>         | <b>56.25</b>             | <b>33.88</b> | <b>79.17</b>           | <b>25.00</b> | <b>.004</b>      |
| <b>Role Limitations-Emotional</b> | <b>40.47</b>             | <b>39.62</b> | <b>66.66</b>           | <b>38.77</b> | <b>.024</b>      |
| <b>Mental Health</b>              | <b>35.69</b>             | <b>20.88</b> | <b>67.94</b>           | <b>20.47</b> | <b>&lt;.001</b>  |
| Health Changes                    | 48.21                    | 18.25        | 52.78                  | 19.02        | .411             |
| Physical Component Summary        | 53.12                    | 9.76         | 51.80                  | 9.60         | .650             |
| <b>Mental Component Summary</b>   | <b>28.20</b>             | <b>11.67</b> | <b>44.62</b>           | <b>12.06</b> | <b>&lt;.001</b>  |
| <b>Summary Score 8</b>            | <b>55.61</b>             | <b>19.57</b> | <b>72.60</b>           | <b>19.79</b> | <b>.005</b>      |
| <b>Summary Score 36</b>           | <b>21.47</b>             | <b>6.50</b>  | <b>26.47</b>           | <b>6.57</b>  | <b>.014</b>      |

  

| SF-36 Measure                      | Major Depressive Disorder |              |                        |              |                  |
|------------------------------------|---------------------------|--------------|------------------------|--------------|------------------|
|                                    | Yes (N=11) <sup>c</sup>   |              | No (N=65) <sup>c</sup> |              | p <sup>a,b</sup> |
|                                    | Mean <sup>d</sup>         | SD           | Mean <sup>d</sup>      | SD           |                  |
| Physical Functioning               | 78.64                     | 21.11        | 89.69                  | 18.52        | .077             |
| Role Limitations-Physical          | 54.55                     | 48.50        | 80.77                  | 35.29        | .112             |
| <b>Bodily Pain</b>                 | <b>55.82</b>              | <b>28.39</b> | <b>79.48</b>           | <b>24.22</b> | <b>.005</b>      |
| <b>General Health Perceptions</b>  | <b>49.64</b>              | <b>12.77</b> | <b>70.34</b>           | <b>23.45</b> | <b>&lt;.001</b>  |
| <b>Vitality/Energy Level</b>       | <b>33.18</b>              | <b>21.25</b> | <b>53.52</b>           | <b>23.88</b> | <b>.010</b>      |
| <b>Social Functioning</b>          | <b>40.91</b>              | <b>21.72</b> | <b>79.04</b>           | <b>26.06</b> | <b>&lt;.001</b>  |
| <b>Role Limitations-Emotional</b>  | <b>27.26</b>              | <b>32.72</b> | <b>63.59</b>           | <b>38.97</b> | <b>.005</b>      |
| <b>Mental and Emotional Health</b> | <b>30.91</b>              | <b>15.29</b> | <b>67.13</b>           | <b>20.38</b> | <b>&lt;.001</b>  |
| <b>Health Changes</b>              | <b>38.64</b>              | <b>13.06</b> | <b>55.00</b>           | <b>19.37</b> | <b>.009</b>      |
| Physical Component Summary         | 48.98                     | 10.03        | 53.02                  | 9.64         | .207             |
| <b>Mental Component Summary</b>    | <b>25.33</b>              | <b>10.36</b> | <b>43.45</b>           | <b>12.10</b> | <b>&lt;.001</b>  |
| <b>Summary Score 8</b>             | <b>46.36</b>              | <b>17.11</b> | <b>72.69</b>           | <b>19.41</b> | <b>&lt;.001</b>  |
| <b>Summary Score 36</b>            | <b>18.54</b>              | <b>5.43</b>  | <b>26.78</b>           | <b>6.43</b>  | <b>&lt;.001</b>  |

  

| SF-36 Measure                      | Posttraumatic Stress Disorder |              |                        |              |                  |
|------------------------------------|-------------------------------|--------------|------------------------|--------------|------------------|
|                                    | Yes (N=6) <sup>c</sup>        |              | No (N=70) <sup>c</sup> |              | p <sup>a,b</sup> |
|                                    | Mean <sup>d</sup>             | SD           | Mean <sup>d</sup>      | SD           |                  |
| <b>Physical Functioning</b>        | <b>70.00</b>                  | <b>25.88</b> | <b>89.64</b>           | <b>17.88</b> | <b>.015</b>      |
| Role Limitations-Physical          | 50.00                         | 54.77        | 79.29                  | 36.11        | .251             |
| Bodily Pain                        | 61.00                         | 33.36        | 77.34                  | 24.20        | .141             |
| <b>General Health Perceptions</b>  | <b>49.00</b>                  | <b>23.12</b> | <b>68.91</b>           | <b>22.84</b> | <b>.044</b>      |
| Vitality/Energy Level              | 35.00                         | 24.29        | 51.88                  | 24.19        | .105             |
| <b>Social Functioning</b>          | <b>47.92</b>                  | <b>20.03</b> | <b>75.71</b>           | <b>28.38</b> | <b>.022</b>      |
| <b>Role Limitations-Emotional</b>  | <b>27.77</b>                  | <b>38.97</b> | <b>60.95</b>           | <b>39.31</b> | <b>.051</b>      |
| <b>Mental and Emotional Health</b> | <b>42.00</b>                  | <b>15.13</b> | <b>63.54</b>           | <b>23.36</b> | <b>.030</b>      |
| Health Changes                     | 45.83                         | 18.82        | 53.21                  | 19.47        | .375             |
| Physical Component Summary         | 46.14                         | 13.39        | 52.96                  | 9.28         | .100             |
| <b>Mental Component Summary</b>    | <b>30.26</b>                  | <b>9.07</b>  | <b>41.71</b>           | <b>13.42</b> | <b>.045</b>      |
| <b>Summary score 8</b>             | <b>47.84</b>                  | <b>23.09</b> | <b>70.66</b>           | <b>20.15</b> | <b>.010</b>      |
| <b>Summary score 36</b>            | <b>18.53</b>                  | <b>7.58</b>  | <b>26.18</b>           | <b>6.55</b>  | <b>.008</b>      |

*Note.* Results for prolonged grief disorder, major depressive disorder, and posttraumatic stress disorder are presented; the incidence of Panic Disorder and Generalized Anxiety Disorder in this sample was too low to run meaningful comparison analyses.

<sup>a</sup> *t*-tests.

<sup>b</sup> Bolded values were statistically significant at the  $p < .05$  level.

<sup>c</sup> Sample sizes ranged based on missing data.

<sup>d</sup> Possible scores ranged from 0 to 100, which lower scores indicating poorer functioning.

**Appendix D.** Associations between Mental Health Service Use and Mental Disorders among Bereaved Caregivers

| Mental Disorder Type                        | Total Sample Using Mental Health Services (N = 76) <sup>a</sup> |           | p <sup>b</sup> |
|---------------------------------------------|-----------------------------------------------------------------|-----------|----------------|
|                                             | N <sup>a</sup>                                                  | %         |                |
| Prolonged Grief Disorder (n=14)             | 6                                                               | 43        | .781           |
| Major Depressive Disorder (n=11)            | 6                                                               | 55        | .315           |
| Generalized Anxiety Disorder (n=2)          | 2                                                               | 100       | .168           |
| Panic Disorder (n=3)                        | 2                                                               | 67        | .563           |
| <b>Posttraumatic Stress Disorder (n=6)</b>  | <b>5</b>                                                        | <b>83</b> | <b>.038</b>    |
| <b>Any SCID Diagnosis<sup>c</sup>(n=16)</b> | <b>10</b>                                                       | <b>63</b> | <b>.047</b>    |

<sup>a</sup>The sample size for participants with SCID data was 76 and with Prolonged Grief Disorder data was 86.

<sup>b</sup> $\chi^2$  test for Prolonged Grief Disorder, Major Depressive Disorder, and Any SCID Diagnosis. Fisher's Exact Test (2-sided significance level) for Generalized Anxiety Disorder, Panic Disorder, and Posttraumatic Stress Disorder, which each had 2 cells with expected counts less than 5. Samples include caregivers without missing psychiatric diagnostic data. Bolded values were statistically significant at the  $p < .05$  level. <sup>c</sup>SCID=Structured Clinical Interview for the *DSM-IV*.
